# Supplementary material
Source: Springer Nature journal article supplement (https://www.springermedizin.de/resource/supplementary/12987_2007_291_MOESM8_ESM.pdf/9611698)

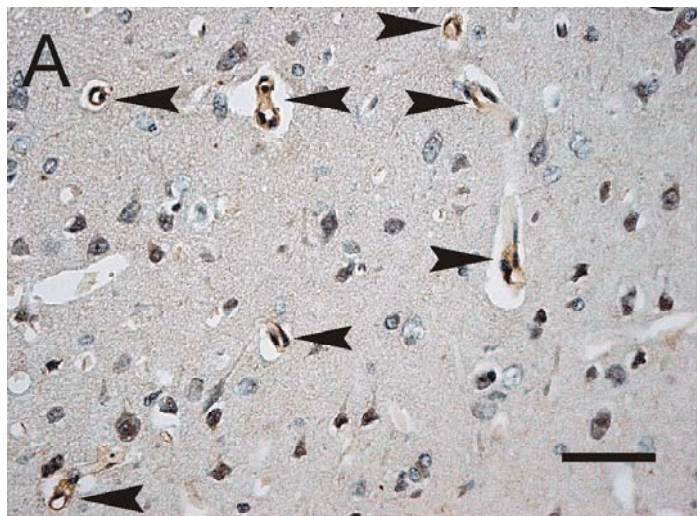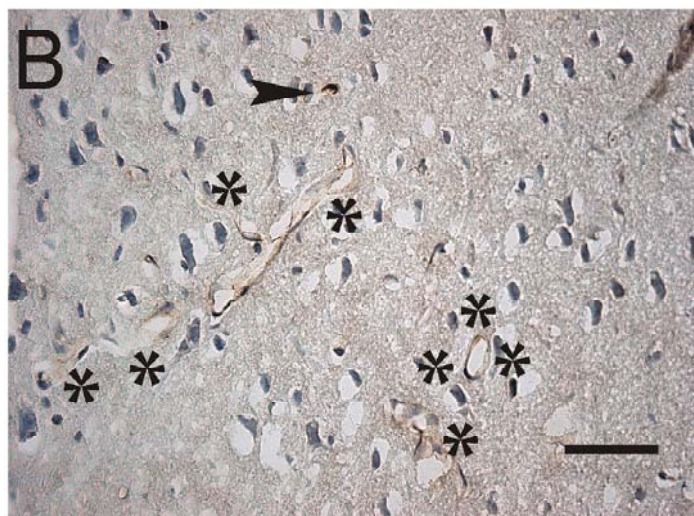

Supplement: MOESM8 [file 9611698]
